# Supplementary figures and images for: Sensitivity and Specificity of CD19.CAR-T Cell Detection by Flow Cytometry and PCR
Source: MDPI journal article supplement (doi:10.3390/cells10113208), 2021-11-17

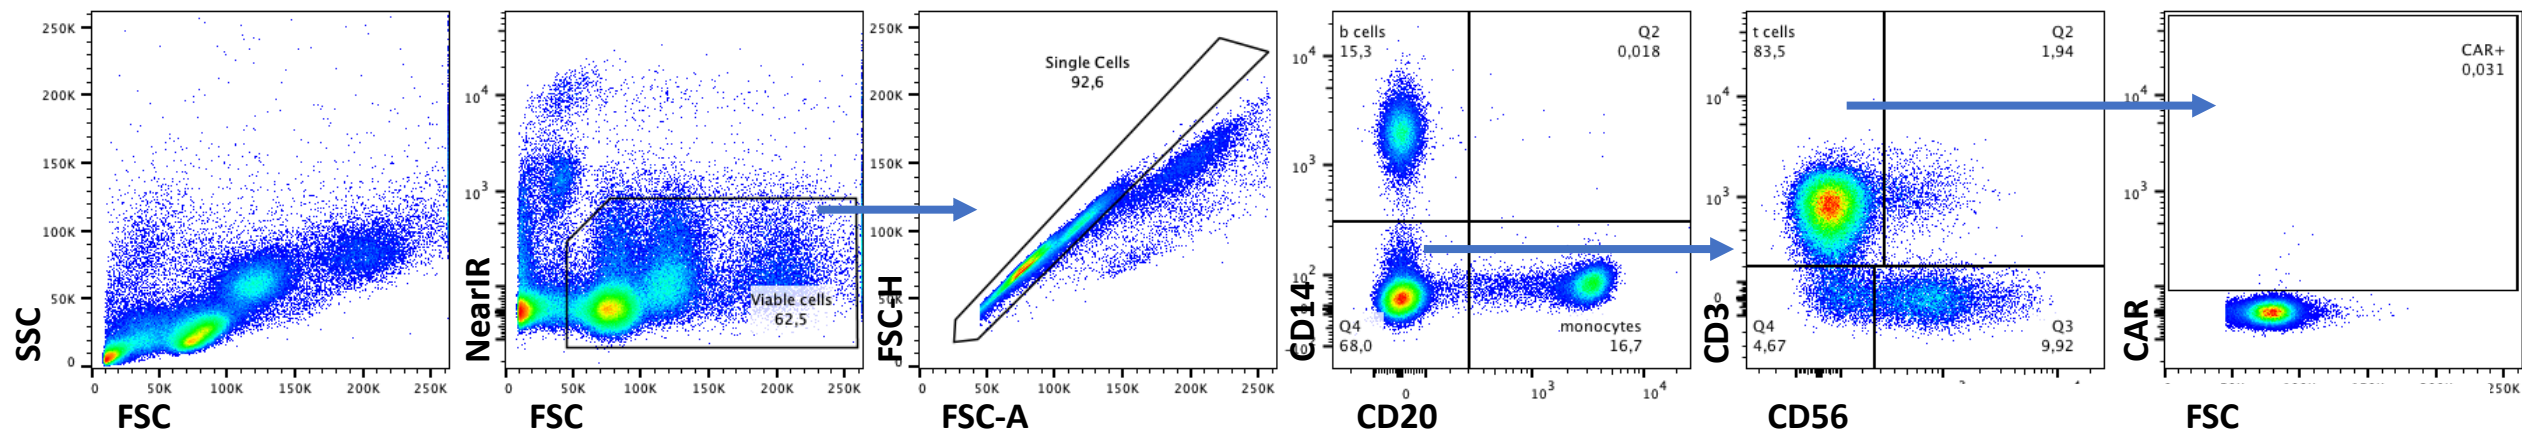

Supplement: s1 [file s1]

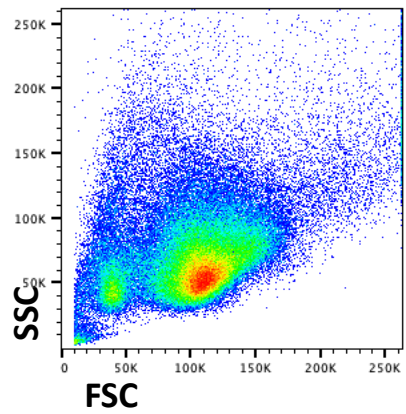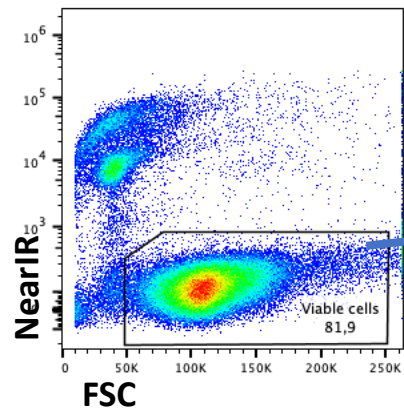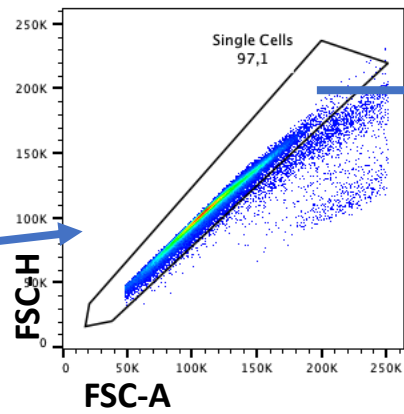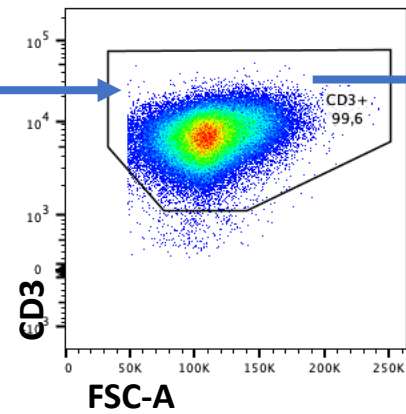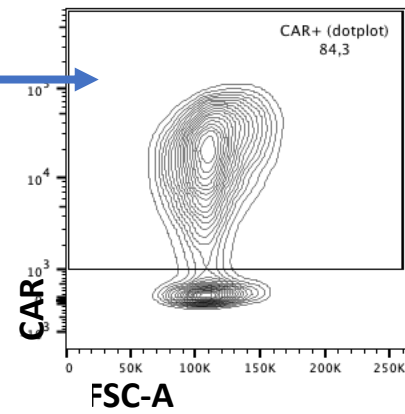

Supplement: s1 [file s1]

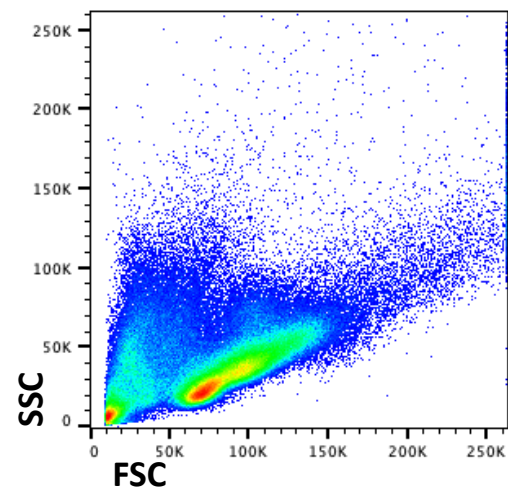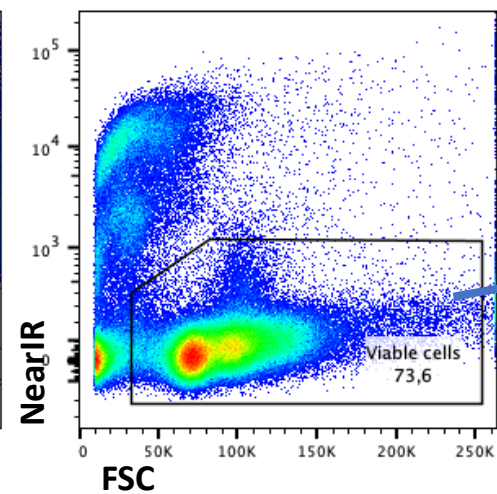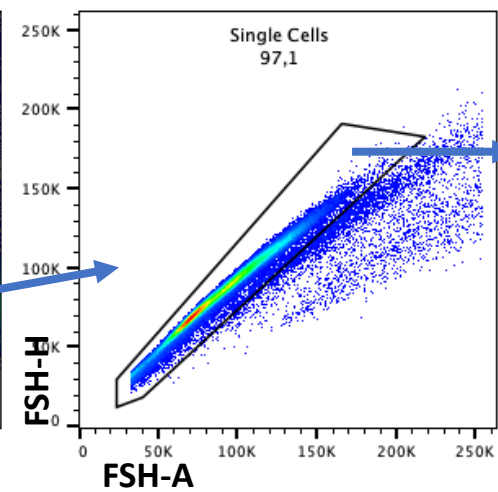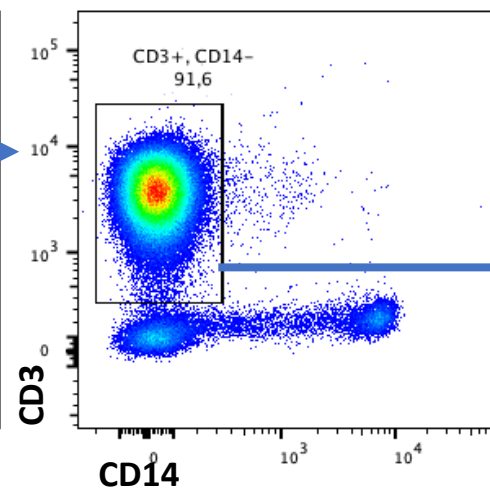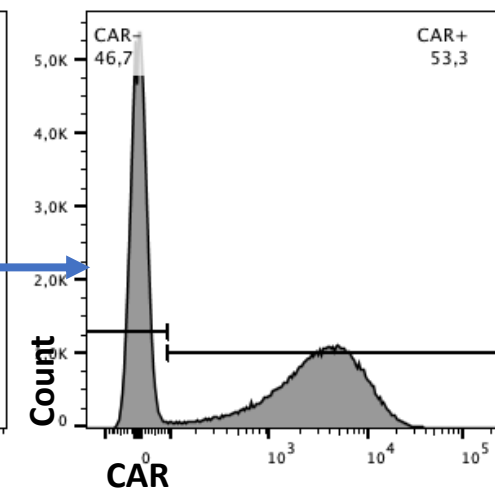

Supplement: s1 [file s1]
